# Supplementary material for: Sensitive detection of transcription factors using an Ag+-stabilized self-assembly triplex DNA molecular switch
Source: Royal Society of Chemistry journal article supplement (doi:10.1039/c4cc06205a), 2014-01-01
Supplement: c4cc06205a1.pdf [file c4cc06205a1.pdf]

## Supplementary Information

### **Sensitive detection of transcription factors with Ag<sup>+</sup>-stabilized self-assembly triplex DNA molecular switch**

Desong Zhu,<sup>a</sup> Jing Zhu,<sup>a</sup> Ye Zhu,<sup>a</sup> Lei Wang<sup>\*b</sup> and Wei Jiang<sup>\*a</sup>

<sup>a</sup> Key Laboratory for Colloid and Interface Chemistry of Education  
Ministry, School of Chemistry and Chemical Engineering, Shandong  
University, 250100 Jinan, P. R. China

<sup>b</sup> School of Pharmacy, Shandong University, 250012, Jinan, P. R. China

Corresponding author: Tel: +86 531 88363888; fax: +86 531 88564464.

E-mail: [wjiang@sdu.edu.cn](mailto:wjiang@sdu.edu.cn)

Tel: +86 531 88380036. Email: [wangl-sdu@sdu.edu.cn](mailto:wangl-sdu@sdu.edu.cn)

## **Chemicals and materials**

All oligonucleotides were synthesized and purified by Sangon (Shanghai, China). The sequences were shown Table 1. The purified recombinant NF- $\kappa$ B p50 protein was purchased from Cayman Chemical (Ann Arbor, MI, USA). HeLa nuclear extract and HeLa nuclear extract (TNF- $\alpha$  stimulated) were purchased from Active Motif (Carlsbad, CA, USA). Human thrombin, human immunoglobulin G (IgG) and bovine serum albumin were purchased from Sigma-Aldrich Co. (St Louis, MO, USA). All other chemicals (analytical grade) were obtained from standard reagent suppliers and used without further purification. All solutions were prepared using the ultrapure water that was obtained through a Millipore Milli-Q water purification system (>18.25 M $\Omega$ ). All the single-stranded DNA stock solutions (100  $\mu$ M) were prepared by solving them in ultrapure water and stored in the dark at -20  $^{\circ}$ C. The working solution of 2.5  $\mu$ M was obtained by diluting the stock solution with 10 mM PBS buffer (pH 7.4). To obtain the 6-FAM-dsDNA, the corresponding complementary single-stranded DNA (DNA-1 and DNA-2) were mixed at the same molar ratios with the final concentration of 1.25  $\mu$ M in the hybridization buffer (10 mM Tris-HCl, pH 7.4, 100 mM NaCl, 1 mM EDTA). The mixture was heated at 95  $^{\circ}$ C for 5 minutes and then slowly cooled down to room temperature.

## **Measurement of fluorescence spectrum**

2  $\mu$ L 6-FAM-dsDNA (1.25  $\mu$ M) was mixed with 10  $\mu$ L BHQ-1-TFO (2.5  $\mu$ M) and 2  $\mu$ L AgNO<sub>3</sub> (500  $\mu$ M) for 30 minutes at 37  $^{\circ}$ C in 10 mM PBS buffer solution (pH 7.4, 200 mM NaNO<sub>3</sub>). For the detection of purified recombinant NF- $\kappa$ B p50, 2.5  $\mu$ L purified recombinant NF- $\kappa$ B p50 (11  $\mu$ M) were added to above system to incubate 10 minutes at 37  $^{\circ}$ C. For the detection of real samples, 2.5  $\mu$ L TNF- $\alpha$  stimulated HeLa nuclear extracts (0.5  $\mu$ g/ $\mu$ L) were added to above system to incubate 10 minutes at 37  $^{\circ}$ C. The final volume was 50  $\mu$ L. The final concentrations were 50 nM of 6-FAM-dsDNA, 500 nM of BHQ-1-TFO, 20  $\mu$ M of AgNO<sub>3</sub>, 0.55 nM of purified recombinant NF- $\kappa$ B p50 and 25 ng/ $\mu$ L of TNF- $\alpha$  stimulated HeLa nuclear extract,

respectively. Finally, the fluorescence spectrums were recorded on Hitachi F-7000 spectrofluorophotometer (Hitachi, Japan). The excitation and emission wavelengths were set at 495 and 518 nm, respectively.

### **UV melting curves of the triplex DNA**

10  $\mu\text{L}$  6-FAM-dsDNA (50  $\mu\text{M}$ ) was mixed with 5  $\mu\text{L}$  BHQ-1-TFO (100  $\mu\text{M}$ ) and 20  $\mu\text{L}$   $\text{AgNO}_3$  (500  $\mu\text{M}$ ) for 30 minutes at 37  $^\circ\text{C}$  in 10 mM PBS buffer solution (pH 7.4, 200 mM  $\text{NaNO}_3$ ). The final volume was 500  $\mu\text{L}$ . The final concentrations were 1  $\mu\text{M}$  of 6-FAM-dsDNA, 1  $\mu\text{M}$  of BHQ-1-TFO and 20  $\mu\text{M}$  of  $\text{AgNO}_3$ , respectively.

The melting temperatures of the triplex DNAs were determined by monitoring the absorbance intensities at 260 nm at different temperatures. The absorbance intensities were then plotted as a function of the temperature ranging from 25 to 80  $^\circ\text{C}$ . The values of melting temperatures of the triplex DNAs were obtained from the transition midpoint of the melting curves. UV absorption spectras were recorded on UV-2450 spectrophotometer (Shimadzu, Japan).

### **Results**

The recognition and detection of NF- $\kappa\text{B}$  p50 depended greatly on the stability of the triplex DNA. Therefore, the influencing factors of stability, such as the concentration of  $\text{Ag}^+$ , the length of the BHQ-1-TFO, the concentration of the BHQ-1-TFO and pH were investigated.

The first influencing factor was the  $\text{Ag}^+$  concentration (see Fig. S1, ESI $^\dagger$ ).  $\Delta F$  increased along with the increase of  $\text{Ag}^+$  concentration and reached a plateau after 20  $\mu\text{M}$ . This phenomenon demonstrated that  $\text{Ag}^+$  indeed improved the stability of triplex DNA, which was consistent with the previous report.<sup>1</sup> As a result, 20  $\mu\text{M}$  of  $\text{Ag}^+$  was chosen for further experiments. Moreover, as shown in Fig. S5, compared with original melting temperature of the triplex DNA ( $T_m=33$   $^\circ\text{C}$ ) in the absence of  $\text{Ag}^+$ , the raised melting temperature ( $T_m2=57$   $^\circ\text{C}$ ) in the presence of  $\text{Ag}^+$  further substantiated the stabilization effect of  $\text{Ag}^+$  on the triplex DNA.

The second influencing factor was the length of the BHQ-1-TFO (see Fig. S2, ESI $^\dagger$ ). The affinity of BHQ-1-TFO for 6-FAM-dsDNA was enhanced with the increase of the length of the BHQ-1-TFO from 12-mer to 15-mer, which resulted in

the increase of the amounts of triplex DNAs and the decrease of F0. However, when the length of the BHQ-1-TFO reached 18-mer, the increased electrostatic repulsion between 6-FAM-dsDNA and BHQ-1-TFO weakened the affinity of BHQ-1-TFO for 6-FAM-dsDNA, which resulted in the decrease of the amounts of triplex DNAs and the increase of F0. In other word, F0 had a minimum value with 15-mer BHQ-1-TFO. Because the affinity of NF- $\kappa$ B p50 for dsDNA is much stronger than that of TFO for dsDNA<sup>2,3</sup>, it was very easy for NF- $\kappa$ B p50 to displace BHQ-1-TFO (from 12-mer to 18-mer). Almost the same fluorescence intensity (F) could be observed with all three triplex DNA probes upon NF- $\kappa$ B p50 addition. Therefore,  $\Delta F$  had a maximum value with 15-mer BHQ-1-TFO. We chose 15-mer BHQ-1-TFO for further experiments. In addition, as shown in Fig. S5, the melting temperatures ( $T_m$ ) of three triplex DNAs were 47 °C ( $T_{m1}$ = 47 °C when using 12-mer BHQ-1-TFO ), 57 °C ( $T_{m2}$ = 57 °C when using 15-mer BHQ-1-TFO) and 52 °C ( $T_{m3}$ =52 °C when using 18-mer BHQ-1-TFO), respectively.  $T_m$  had a maximum value with 15-mer BHQ-1-TFO. Compared with  $T_{m2}$ , the lower  $T_{m3}$  attributed to the reduction of the amount of triplex DNAs that resulted from the increased electrostatic repulsion between TFO and dsDNA. This result further substantiated that in the fluorescence analysis the high F0 when using the 18-mer TFO was indeed due to the increased electrostatic repulsion between TFO and dsDNA.

The third influencing factor was the concentration of BHQ-1-TFO (see Fig. S3, ESI†). The  $\Delta F$  increased along with the increase of the BHQ-1-TFO concentration and reached a plateau after 500 nM. Therefore, 500 nM BHQ-1-TFO was selected for the reasearch.

The fourth influencing factor was pH (see Fig. S4, ESI†). The  $\Delta F$  increased with the pH value over the range of 6.0-7.4 and reached the maximum at pH 7.4. However, the  $\Delta F$  decreased dramatically when the pH value was higher than 7.4. The reason is that the alkaline condition was unsuitable for the formation of the triplex DNA (Ag<sup>+</sup>-STDMS) because of the formation of the silver oxide precipitation. So, pH 7.4 was the optimum condition for the research.

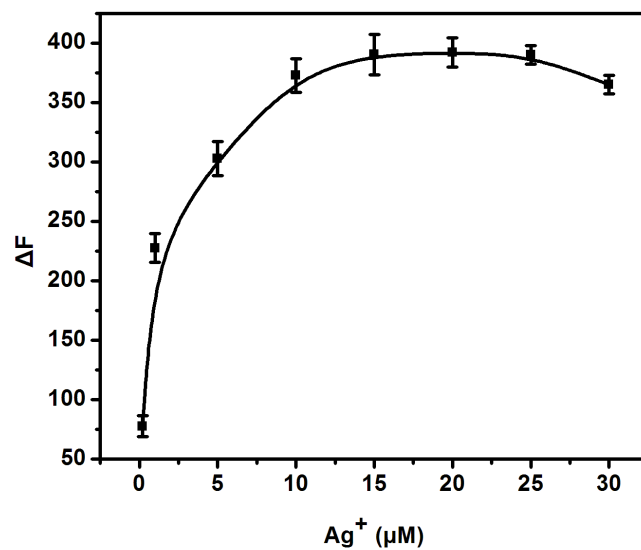

Fig. S1 The effect of Ag<sup>+</sup> on the ΔF.

Experimental conditions: 10 mM of PBS (pH 7.4), 200 mM of NaNO<sub>3</sub>, 50 nM 6-FAM-dsDNA, 500 nM BHQ-1-TFO (15-mer), 0.55 nM of NF-κB p50, 30 minutes of self-assembly at 37 °C, 10 minutes of displacement at 37 °C.

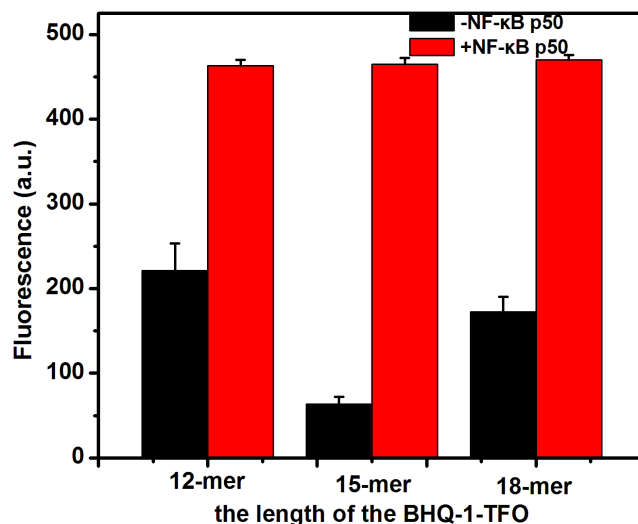

Fig. S2 The effect of the length of the BHQ-1-TFO on the ΔF.

Experimental conditions: 10 mM of PBS (pH 7.4), 200 mM of NaNO<sub>3</sub>, 50 nM 6-FAM-dsDNA, 500 nM BHQ-1-TFO, 20 μM of Ag<sup>+</sup>, 0.55 nM of NF-κB p50, 30 minutes of self-assembly at 37 °C, 10 minutes of displacement at 37 °C.

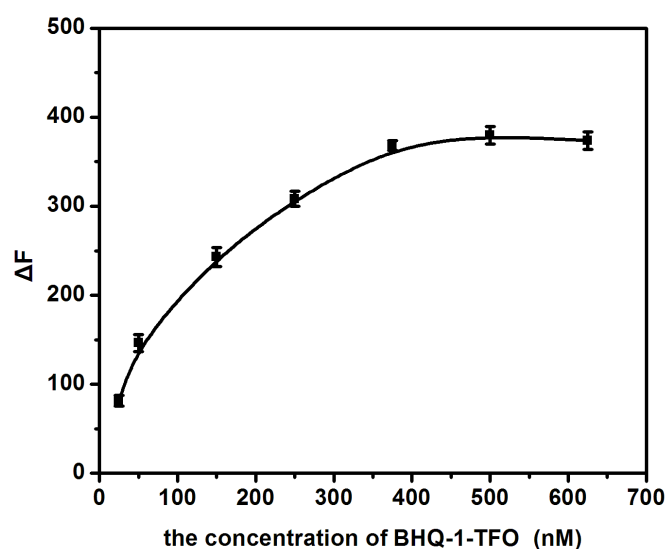

Fig. S3 The effect of the concentration of BHQ-1-TFO (15-mer) on the  $\Delta F$ .  
 Experimental conditions: 10 mM of PBS (pH 7.4), 200 mM of  $\text{NaNO}_3$ , 50 nM 6-FAM-dsDNA, 20  $\mu\text{M}$  of  $\text{Ag}^+$ , 0.55 nM of NF- $\kappa\text{B}$  p50, 30 minutes of self-assembly at 37 °C, 10 minutes of displacement at 37 °C.

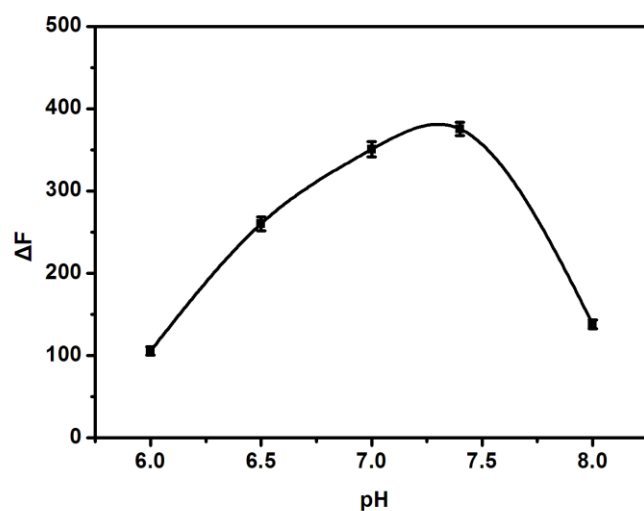

Fig. S4 The effect of pH on the  $\Delta F$ .  
 Experimental conditions: 10 mM of PBS, 200 mM of  $\text{NaNO}_3$ , 50 nM 6-FAM-dsDNA, 500 nM BHQ-1-TFO (15-mer), 20  $\mu\text{M}$  of  $\text{Ag}^+$ , 0.55 nM of NF- $\kappa\text{B}$  p50, 30 minutes of self-assembly at 37 °C, 10 minutes of displacement at 37 °C.

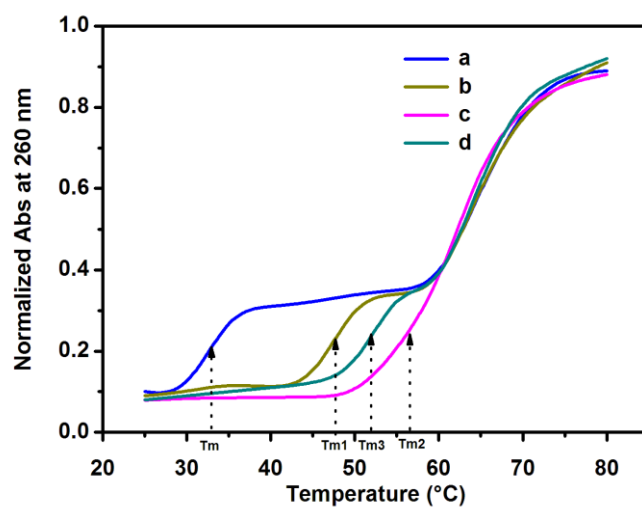

Fig. S5 UV melting curves of triplex DNA obtained in the presence of various amounts of  $\text{Ag}^+$  and different length of the BHQ-1-TFO.

(a) 6-FAM-dsDNA + BHQ-1-TFO (15-mer), (b) 6-FAM-dsDNA + BHQ-1-TFO (12-mer) +  $\text{Ag}^+$ , (c) 6-FAM-dsDNA + BHQ-1-TFO (15-mer) +  $\text{Ag}^+$ , (d) 6-FAM-dsDNA + BHQ-1-TFO (18-mer) +  $\text{Ag}^+$ .

Experimental conditions: 10 mM of PBS (pH 7.4), 200 mM of  $\text{NaNO}_3$ , 1  $\mu\text{M}$  6-FAM-dsDNA, 1  $\mu\text{M}$  BHQ-1-TFO, 20  $\mu\text{M}$  of  $\text{Ag}^+$ , 30 minutes of self-assembly at 37 °C.

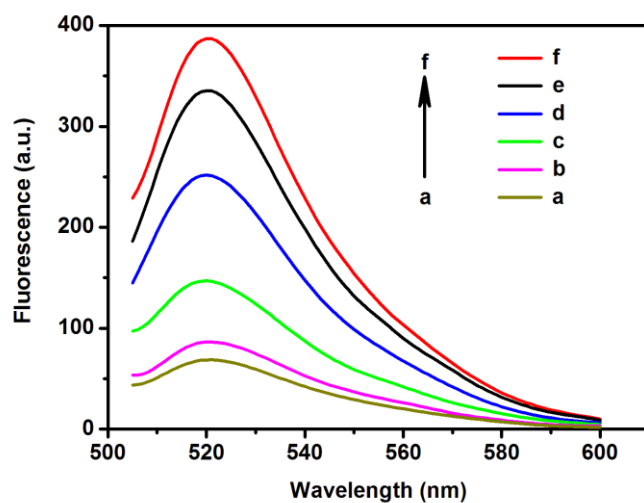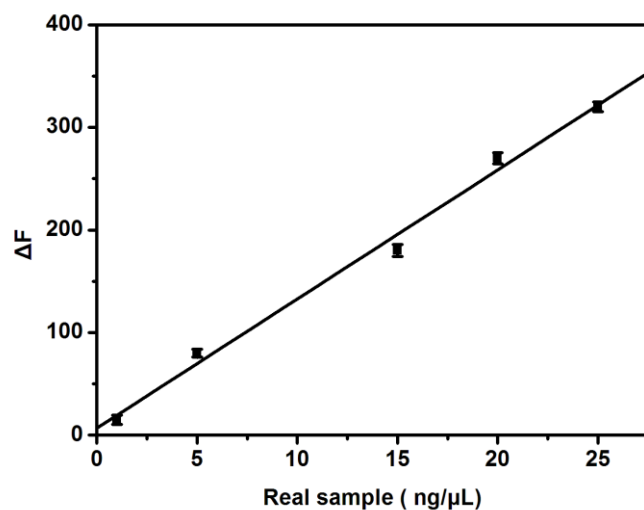

Fig. S6 The fluorescence spectrums with increasing concentration of TNF- $\alpha$ -treated nuclear extracts (above) and the relationship between fluorescence intensity and the concentration of TNF- $\alpha$ -treated nuclear extracts (below). The error bars showed the standard deviation of three replicate determinations. Experimental conditions: 10 mM of PBS (pH 7.4), 200 mM of NaNO<sub>3</sub>, 50 nM of 6-FAM-dsDNA, 500 nM of BHQ-1-TFO (15-mer), 20  $\mu$ M of Ag<sup>+</sup>, target (a to f): 0, 1, 5, 15, 20 and 25 ng/ $\mu$ L, respectively. 30 minutes of self-assembly at 37  $^{\circ}$ C, 10 minutes of displacement at 37  $^{\circ}$ C. The excitation and emission wavelengths were set at 495 nm and 518 nm, respectively.



Table S1. Comparison of strategies for detection of NF- $\kappa$ B p50.

| Strategy  | Limit of detection |
|-----------|--------------------|
| ref 4     | 1 nM               |
| ref 5     | 1 nM               |
| ref 6     | 5 nM               |
| ref 7     | 0.1 nM             |
| this work | 0.025 nM           |

## Reference

- 1 T. Ihara, T. Ishii, N. Araki, A. W. Wilson and A. Jyo, *J. Am. Chem. Soc.*, 2009, **131**, 3826–3827.
- 2 M. B. Urban, P. A. Baeuerle, *genes & development*, 1990, **4**, 1975-1984.
- 3 L. J. Maher, III, P. B. Dervan, and B. J. Wold, *Biochemistry*, 1990, **29**, 8820-8826.
- 4 A. Vallee-Belisle, A. J. Bonham, N. O. Reich, F. Ricci and K. W. Plaxco, *J. Am. Chem. Soc.*, 2011, **133**, 13836–13839.
- 5 J. J. Liu, X. R. Song, Y. W. Wang, G. N. Chen and H. H. Yang, *Nanoscale*, 2012, **4**, 3655–3659.
- 6 J. K. Wang, T. X. Li, X. Y. Guo and Z. H. Lu, *Nucleic Acids Res.*, 2005, **33**, e23.
- 7 X. F. Liu, L. Ouyang, X. H. Cai, Y. Q. Huang, X. L. Feng, Q. L. Fan, W. Huang, *Biosens. Bioelectron.*, 2013, **41**, 218–224.
